# Supplementary material for: Protein-based condensation mechanisms drive the assembly of RNA-rich P granules
Source: eLife. 2021 Jun 9;10:e63698. doi: 10.7554/eLife.63698 (PMC8238508; doi:10.7554/eLife.63698)
Supplement: Figure 2—source data 1. [file elife-63698-fig2-data1.xlsx]

## Sheet: Figure 2B
Figure 2B: Scatterplot showing the number of MEG-3 condensates in P2 in embryos expressing the indicated MEG-3 derivatives
MEG-3	MEG-3Cterm	MEG-3IDR	MEG-3HMGL-
86	53	15	106
64	43	15	94
66	46	14	74
62	63	20	64
47	49	23	57
49	32	18	48
	41	25	68
		13
		34

## Sheet: Figure 2C
Figure 2C Scatterplot showing enrichment of MEG-3 in P2 over the somatic blastomere EMS, calculated by dividing the average intensity in P2 by the average intensity in EMS.
MEG-3	MEG-3Cterm	MEG-3IDR	MEG-3HMGL-
1.85498	1.20235	1.49383	2.08835
1.66472	1.04888	1.69472	1.77705
1.88847	1.02416	1.76414	1.61864
2.31501	1.1273	1.4227	1.56798
2.08404	0.893335	1.70746	2.0746
1.81852	1.07408	1.80644	1.43331
	1.05222	1.72647	2.07448
		1.59245
		1.93921

## Sheet: Figure 2D
Figure 2D Scatterplot showing the fraction the MEG-3 signal localized to condensates over total signal in P2.
MEG-3	MEG-3Cterm	MEG-3IDR	MEG-3HMGL-
0.180774	0.0283348	0.0023705	0.0637987
0.144034	0.0128963	0.00244092	0.0650725
0.171736	0.0130837	0.00405805	0.0776457
0.217824	0.026781	0.00542415	0.0683881
0.177584	0.0171276	0.00320092	0.0729538
0.211291	0.00800406	0.00379136	0.0514054
	0.00976383	0.00747032	0.0444293
		0.0013793
		0.0115567
