# Supplementary material for: Protein-based condensation mechanisms drive the assembly of RNA-rich P granules
Source: eLife. 2021 Jun 9;10:e63698. doi: 10.7554/eLife.63698 (PMC8238508; doi:10.7554/eLife.63698)
Supplement: Figure 3—source data 1. [file elife-63698-fig3-data1.xlsx]

## Sheet: Sheet1
Figure 3C: Scatterplot of the enrichment of PGL-3 in P1 calculated by dividing the average intensity in P1 by the average intensity in AB.
MEG-3	MEG-3Cterm	MEG-3IDR	MEG-3HGML-	No MEG-3
2.27676	1.7765	0.914083	1.08033	0.950876
1.51107	2.08231	0.853223	1.16943	1.32338
1.69262	1.33222	1.14397	0.993888	0.933793
1.71445	1.24398	1.13022	1.10116	1.18454
3.06857	1.00451	1.01169	0.995494	0.993061
3.05093	1.33887	1.04522	1.08861	0.976099
1.37414	1.47317		0.911065
1.92369	2.1211
	1.20346
