# Supplementary material for: Protein-based condensation mechanisms drive the assembly of RNA-rich P granules
Source: eLife. 2021 Jun 9;10:e63698. doi: 10.7554/eLife.63698 (PMC8238508; doi:10.7554/eLife.63698)
Supplement: Figure 4—source data 1. [file elife-63698-fig4-data1.xlsx]

## Sheet: Figure 4B
Figure 4B: Scatterplot showing the ratio of Y51F10.2 to T26A5.2 mRNA signal in P0 and P2 embryos expressing the indicated MEG-3 derivatives
MEG-3		MEG-3IDR		MEG-3Cterm		MEG-3HMGL-		No MEG-3
1 cell	4 cell	1 cell	4 cell	1 cell	4 cell	1 cell	4 cell	1 cell	4 cell
10.1183	14.1813	10.7798	3.59516	13.1613	7.4149	8.71726	5.05669	10.8836	2.54139
13.2358	10.6275	10.931	3.72444	7.92217	6.97379	9.35643	4.53329	11.6947	2.74796
14.5676	8.57204	9.41003	3.53773	12.231	4.39109	8.09063	4.57089	10.9145	2.49798
9.60202	8.09916	13.4925	7.00974	15.7708	8.2256	14.0648	6.62098	13.6837	4.9113
11.6592	8.36483	14.9853	5.0625	8.05337	7.67139	13.1742	4.69593	12.8021	6.26141
9.47109	15.4748	13.6104	3.0174	8.25012	7.31621	11.0338	6.47382	10.8441	2.65895

## Sheet: Figure 4C
Figure 4C Scatterplot showing enrichment of Y51F10.2 mRNA in P2 relative to somatic blastomeres in embryos expressing the indicated MEG-3 derivatives
MEG-3	MEG-3Cterm	MEG-3IDR	MEG-3HMGL-	No MEG-3
1.56621	1.19727	1.20693	1.29262	1.26844
2.03764	1.40004	1.13224	1.21658	1.10357
1.82643	1.22684	1.15326	1.26144	1.19564
1.88137	1.11881	0.94869	1.24684	1.33242
2.53495	1.00152	1.14933	1.1519	1.13612

## Sheet: Figure 4D
Figure 4D: Scatterplot showing enrichment of Y51F10.2 mRNA in P4 relative to somatic blastomeres in embryos expressing the indicated MEG-3 derivatives
MEG-3	MEG-3IDR	MEG-3Cterm	MEG-3HMGL-	No MEG-3
10.71	2.2	2.57	1.33	2.21
7.96	3.74	1.62	1.38	1.85
6.85	3.4	3.46	1.43	2.16
8.3	2.91	1.54	2.34	2.02
9.37	2.89	2.31	2.4	2.64
