# Supplementary material for: Protein-based condensation mechanisms drive the assembly of RNA-rich P granules
Source: eLife. 2021 Jun 9;10:e63698. doi: 10.7554/eLife.63698 (PMC8238508; doi:10.7554/eLife.63698)
Supplement: Figure 5—source data 1. [file elife-63698-fig5-data1.xlsx]

## Sheet: Figure 5A
Figure 5A: 30U RNA binding curves for MEG-3, MEG-3Cterm , MEG-3IDR , and MEG-3HMGL-.
Note: Not all replicates use the same concentrations, N/A in the Y value indicates that concentration was not measured for that replicate
MEG-3
Protein concentration	Bound/Total 1	Bound/Total 2	Bound/Total 3	Bound/Total 4
1500	1.00517	0.994833	1.00026	0.999744
1300	0.997698	0.974908	0.994801	1.02516
1200	0.931885	0.908187	0.922612	0.90661
1100	0.890201	0.879212	0.910129	0.894904
1000	0.838042	0.81017	0.842786	0.842973
900	0.751496	0.791431	0.764754	0.650958
850	0.632356	0.574632	0.747482	0.723348
800	0.444666	0.442004	0.687987	0.679212
700	0.21208	0.201903	0.593459	0.595944
600	0.317087	0.303901	0.485002	0.473952
500	0.0526897	0.0434622	0.211437	0.230416
400	0.164916	0.149114	0.104544	0.101686
100	0.0505513	0.0466433	0.107924	0.112355
0	0.00186161	-0.00186161	-3.36736e-05	3.36736e-05
From fit:
Kd	809.8	808.8	661.5	695.9
R Squared	0.9633	0.9615	0.9868	0.9755
MEG-3Cterm
Protein concentration	Bound/Total 1	Bound/Total 2	Bound/Total 3	Bound/Total 4
1500	1.11112	0.888884	0.98759	1.00351
1300	0.962189	0.887493	0.918266	0.956175
1200	0.875187	0.919836	0.87107	1.04537
1100	0.649448	0.665718	0.668391	0.79467
1000	0.616507	0.613701	0.701976	0.717278
900	0.71454	0.675727	0.867262	0.830857
800	0.498755	0.430798	0.615781	0.643187
700	0.408746	0.320125	0.495089	0.533892
600	0.437451	0.352404	0.531205	0.535118
500	0.425142	0.400442	0.531293	0.602492
400	0.429451	0.370356	0.493923	0.452517
200	0.197823	0.161341	0.264585	0.210951
100	0.0811623	0.0804889	0.0768743	0.0939159
50	0.0189614	-0.00262245	0.0244176	0.0233135
0	-0.0192791	0.0192791	-0.000139131	0.000139131
From fit:
Kd	Unstable	Unstable	2167	1752
R Squared	0.9518	0.936	0.9457	0.9599
MEG-3IDR
Protein concentration	Bound/Total 1	Bound/Total 2	Bound/Total 3	Bound/Total 4
600	1.01642	0.98358	N/A	N/A
500	1.01095	0.987728	0.995568	1.00443
450	N/A	N/A	0.995791	0.985347
400	0.969155	0.958439	0.987315	0.977328
350	N/A	N/A	0.946535	0.953316
300	N/A	N/A	0.973613	0.97568
250	N/A	N/A	0.960744	0.940486
200	0.835787	0.845913	0.914774	0.890377
150	N/A	N/A	0.745936	0.721729
100	0.462208	0.636171	0.483701	0.445261
50	0.164221	0.164628	0.0800145	0.0837877
25	0.0827402	0.0893747	-0.0117333	0.00415108
0	-0.000897056	0.000897056	-0.0140205	0.0140205
From fit:
Kd	109.3	83.64	103.3	107.9
R Squared	0.9984	0.9944	0.9984	0.9991
MEG-3HMGL-
Protein concentration	Bound/Total 1	Bound/Total 2	Bound/Total 3	Bound/Total 4
1500	1.03191	0.968092	0.992977	1.00702
1300	1.0694	1.01357	0.962983	0.976266
1200	1.06002	1.00429	0.972794	0.958535
1100	1.06635	1.0013	0.930745	0.698959
1000	1.04041	1.01882	0.907446	0.855008
900	0.904486	0.949265	0.89329	0.878601
850	0.940919	1.0028	0.851318	0.808933
800	0.615136	0.630542	0.835284	0.851541
700	0.403094	0.368905	0.834167	0.818081
600	0.606675	0.649141	0.72292	0.67191
500	0.483061	0.500457	0.262699	0.303936
400	0.320378	0.367082	0.216057	0.295635
200	-0.0504355	-0.0522618	0.0070643	0.0324698
0	-0.110769	0.110769	-0.0152796	0.0152796
From fit:
Kd	669.4	598.1	535.8	516.9
R Squared	0.9216	0.872	0.98	0.9433

## Sheet: Figure 5B
Figure 5B: Competitive nos-2 RNA binding curves for MEG-3 and MEG-3IDR.
Note: Not all replicates use the same concentrations, N/A in the Y value indicates that concentration was not measured for that replicate
MEG-3
LOG[nos-2 concentration (nM 30mers)]	Bound/Total 1	Bound/Total 2	Bound/Total 3	Bound/Total 4
2.60206	0.267373	0.320799	N/A	N/A
2.30103	0.266969	0.271925	0.497455	0.503697
2	0.265451	0.322331	0.352351	0.355475
1.69897	0.419067	0.38371	0.568948	0.588531
1.39794	0.493386	0.53446	0.715365	0.74447
1.09691	0.627045	0.67412	0.905684	0.918239
0.79588	0.782837	0.795576	0.929147	0.840479
0.49485	N/A	N/A	1.00239	0.924719
From Fit:
Ki	10.74	10.26	22.49	34.94
R Squared	0.9842	0.9826	0.9226	0.8605
MEG-3 IDR
LOG[nos-2 concentration (nM 30mers)]	Bound/Total 1	Bound/Total 2	Bound/Total 3	Bound/Total 4
2.60206	0.0902938	0.0918717	N/A	N/A
2.30103	0.0939823	0.0931595	0.254569	0.221597
2	0.129577	0.125682	0.294969	0.280805
1.69897	0.407097	0.418647	0.473322	0.455503
1.39794	0.668832	0.671959	0.788497	0.746897
1.09691	0.829056	0.866782	0.902807	0.889121
0.79588	0.916435	0.901571	1.01667	0.976818
0.49485	N/A	N/A	1.0151	1.01318
From Fit:
Ki	19.95	21.23	28.28	27.43
R Squared	0.9759	0.9693	0.9764	0.9855
