# Supplementary material for: Protein-based condensation mechanisms drive the assembly of RNA-rich P granules
Source: eLife. 2021 Jun 9;10:e63698. doi: 10.7554/eLife.63698 (PMC8238508; doi:10.7554/eLife.63698)
Supplement: Figure 6—source data 1. [file elife-63698-fig6-data1.xlsx]

## Sheet: Figure 6 A
Figure 6 A: Scatterplot of the condensation of MEG-3 and MEG-3 variants incubated with 20ng/ul nos-2 mRNA and 150nM salt.
	MEG-3 in condensates		nos-2 in condensates
	Mean	StDev	Mean	StDev
MEG-3	0.02039	0.005127	0.3	0.012
MEG-3 Cterm	0.003358	0.002418	0.12	0.014
MEG-3 IDR	5.338e-05	4.676e-05	0.25	0.045
MEG-3 HMGL-	0.0299	0.006961	0.34	0.017
MEG-3Cterm HMGL-	0.002309	0.001552	0.11	0.021

## Sheet: Figure 6 C
Figure 6C: Scatterplot of nos-2 RNA enrichment in PGL-3 condensates with and without MEG-3 or MEG-3 variants in the presence of 150μM 30U RNA
No MEG-3	MEG-3	MEG-3HMGL-	MEG-3IDR	MEG-3Cterm	MEG-3Cterm8x	MEG-3Cterm HMGL-	Unlabeled nos-2
1	1.88855	2.00274	1.32417	0.84605	0.777714	0.818982	0.140343
1	1.61591	1.33858	1.07387	0.742279	1.29877	0.965036	0.048386
1	1.47165	1.56622	0.999497	1.09231	1.24524	1.11038	0.063289

## Sheet: Figure 6 D
Figure 6D: Scatterplot of MEG-3 and MEG-3 variant enrichment in PGL-3 condensates in the presence of 40ng/ul nos-2 RNA and 150μM 30U RNA.
MEG-3	MEG-3Cterm	MEG-3IDR	MEG-3HMGL-	MEG-3Cterm8x	MEG-3Cterm HMGL-
0.943469	0.302769	0.410945	0.873591	0.27313	0.317303
1.02832	0.418778	0.599044	0.837277	0.251736	0.307152
1.02821	0.463797	0.589883	1.08521	0.301046	0.447614
