# Supplementary material for: Protein-based condensation mechanisms drive the assembly of RNA-rich P granules
Source: eLife. 2021 Jun 9;10:e63698. doi: 10.7554/eLife.63698 (PMC8238508; doi:10.7554/eLife.63698)
Supplement: Figure 7—source data 1. [file elife-63698-fig7-data1.xlsx]

## Sheet: Figure 7B
Figure 7B: Scatterplot of the ratio of the indicated MBP fusions to GST:MEG-3Cterm HMGL- normalized to the ratio of the same MBP fusion to GST:MEG-3Cterm from the same experiment.
MBP::PGL-1		MBP::PGL-3
GST::MEG-3Cterm	GST::MEG-3Cterm HMGL-	GST::MEG-3Cterm	GST::MEG-3Cterm HMGL-
100	7.1	100	7.4
100	13.7	100	18.1
100	61.2	100	27.1

## Sheet: Figure 7C
Figure 7C:C. Scatterplot of the ratio of PGL-3 (trace labeled with Alexa555) to His-tagged MEG-3 derivatives (trace labeled with Alexa647) immobilized on Nickel-NTA beads, normalized to the average ratio of MBP to MEG-3 derivatives
"Bait"	MEG-3IDR					MEG-3Cterm					MEG-3Cterm HMGL-
"Prey"	MBP	PGL-3				MBP	PGL-3				MBP	PGL-3
Prey concentration (uM)	3	1.5	1.875	2.25	3	3	1.5	1.875	2.25	3	3	1.5	1.875	2.25	3
	0.956868	1.25274	1.42147	1.61941	1.26988	1.07874	1.46896	1.54961	1.88858	2.13951	0.939579	0.91338	0.845053	0.958728	1.13178
	1.04299	1.36624	1.46834	1.57158	1.43575	0.892731	1.39844	1.56917	1.71611	2.13627	1.0003	0.881119	0.860898	0.962383	1.05959
	1.00014	1.36466	1.38346	1.63413	1.31462	1.02853	0.753046	1.5009	1.81558	2.16061	1.06013	0.892769	0.816377	0.980717	1.11031
	0.971304	0.612987	0.52491	0.65434	0.716181	0.972849	0.676677	2.12207	2.87809	2.42471	1.00235	0.47753	0.765101	1.11087	0.735242
	1.02198	1.05823	0.572158	0.722568	0.806602	1.01043	1.34152	2.12014	2.80437	2.19769	0.968019	0.518565	0.728893	0.790983	0.975633
	1.00671	1.35901	0.648401	0.706551	0.77015	1.01672	1.37911	0.908385	2.58069	1.87293	1.02964	0.890931	0.728893	0.766011	0.943932
