# Supplementary material for: Protein-based condensation mechanisms drive the assembly of RNA-rich P granules
Source: eLife journal article supplement (doi:10.7554/elife.63698), 2021-06-09

**A**

|                              | NaCl (mM)                |  | 50 |  | 150 |  | 150 |  |
|------------------------------|--------------------------|--|----|--|-----|--|-----|--|
|                              | <i>nos-2</i> RNA (ng/ul) |  | 20 |  | 80  |  | 80  |  |
| MEG-3                        |                          |  |    |  |     |  |     |  |
| MEG-3 <sub>Cterm</sub>       |                          |  |    |  |     |  |     |  |
| MEG-3 <sub>IDR</sub>         |                          |  |    |  |     |  |     |  |
| MEG-3 <sub>HMGL-</sub>       |                          |  |    |  |     |  |     |  |
| MEG-3 <sub>Cterm HMGL-</sub> |                          |  |    |  |     |  |     |  |

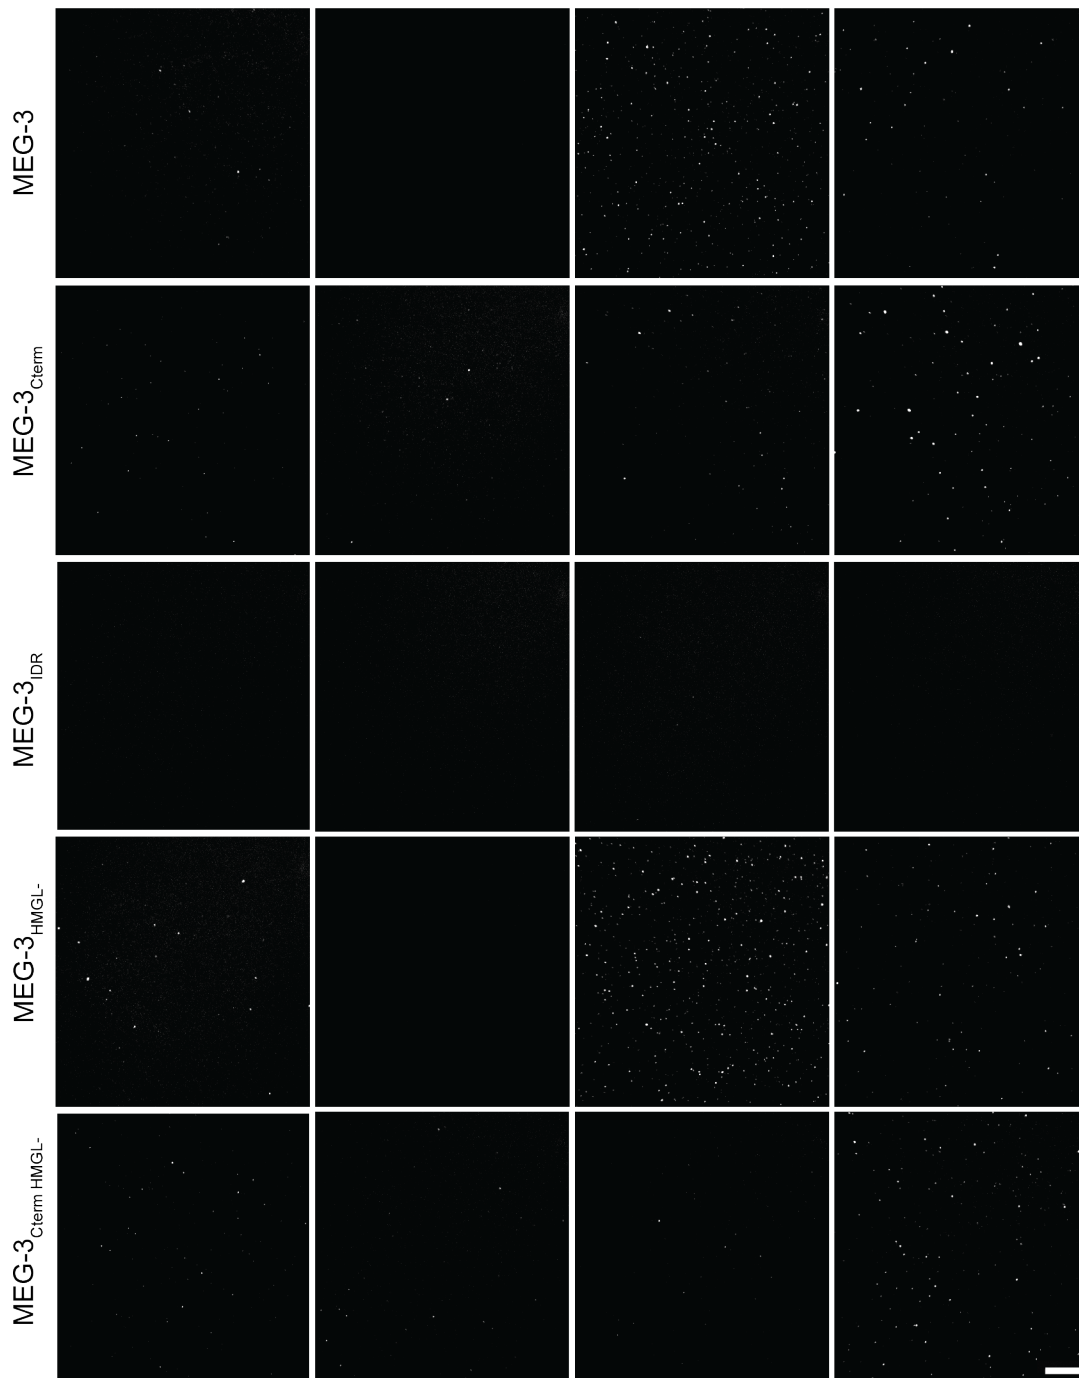**B**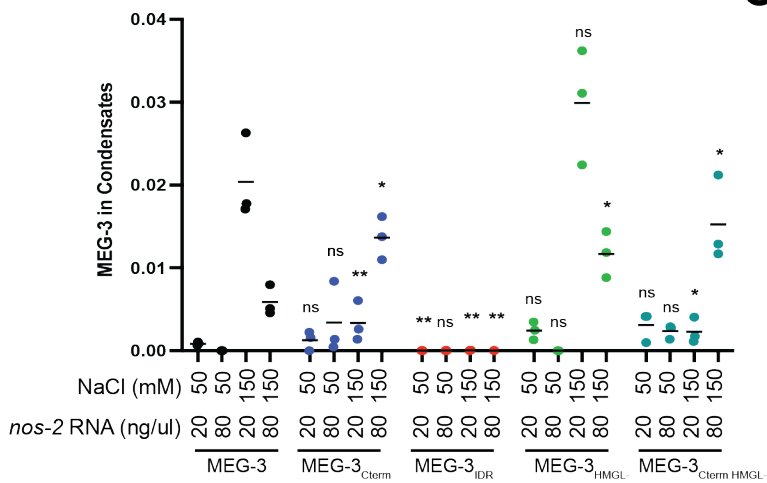**C**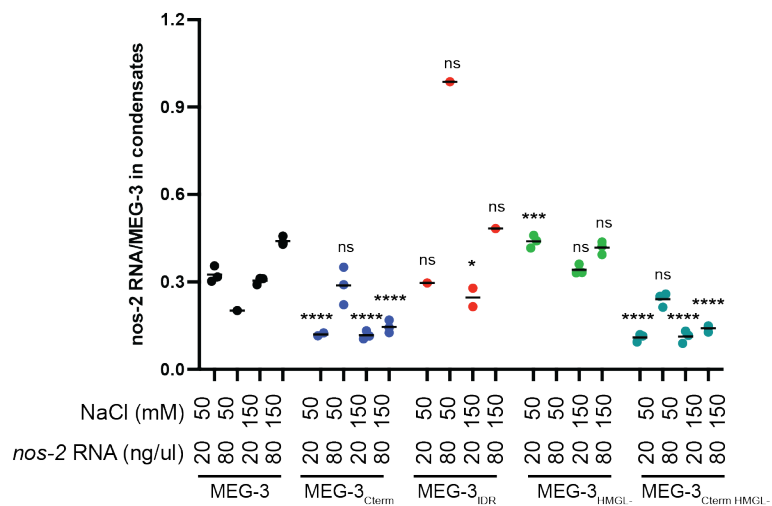

Supplement: supp [file elife-63698-supp-v1.zip]
