# Supplementary figures and images for: Protein-based condensation mechanisms drive the assembly of RNA-rich P granules
Source: eLife journal article supplement (doi:10.7554/elife.63698), 2021-06-09

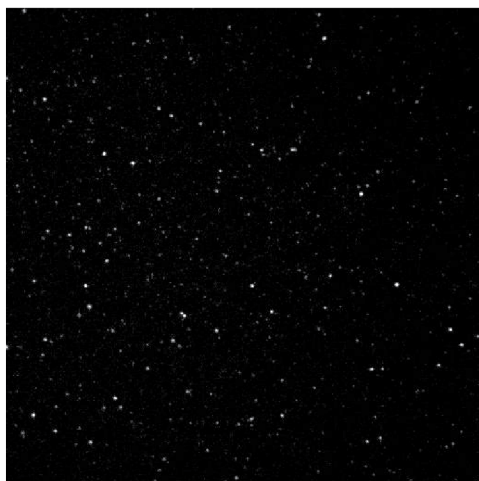

MEG-3

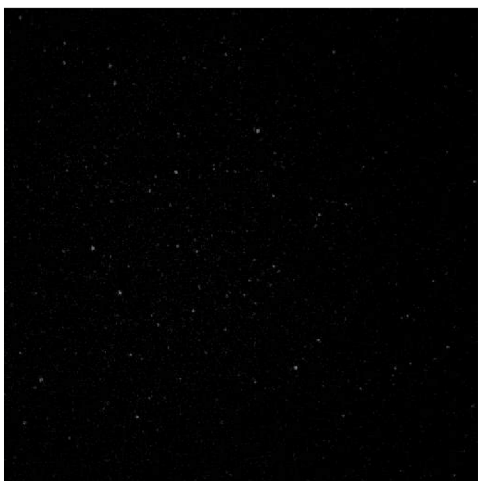

MEG-3<sub>Cterm</sub>

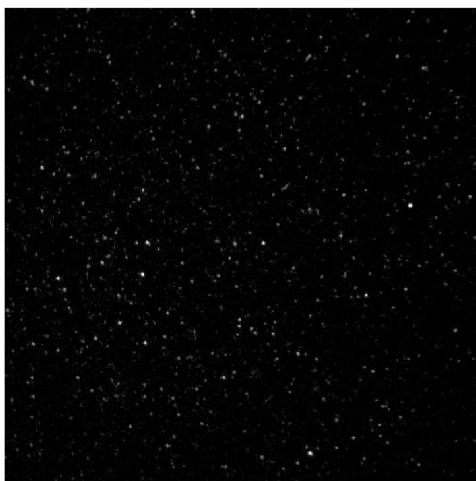

MEG-3<sub>HMGL-</sub>

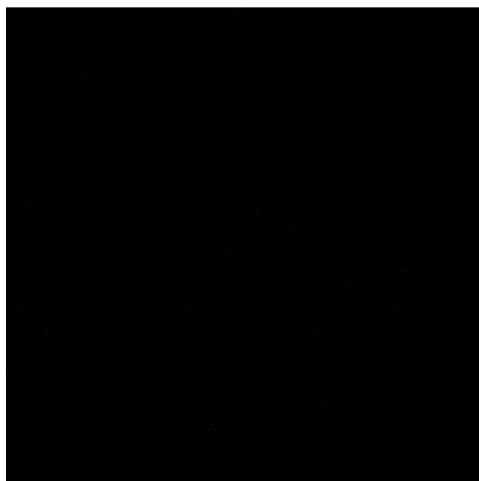

MEG-3<sub>IDR</sub>

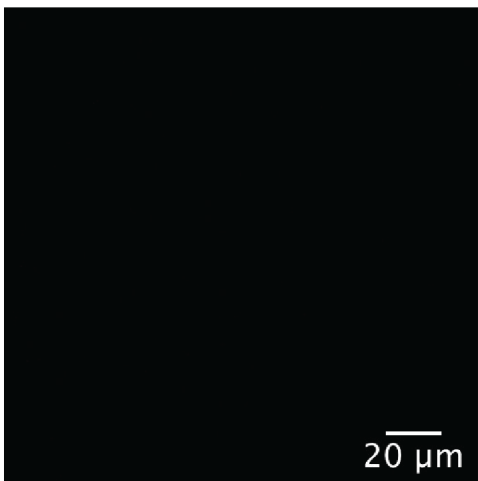

MEG-3<sub>698</sub>

20  $\mu$ m

Supplement: supp [file elife-63698-supp-v1.zip]

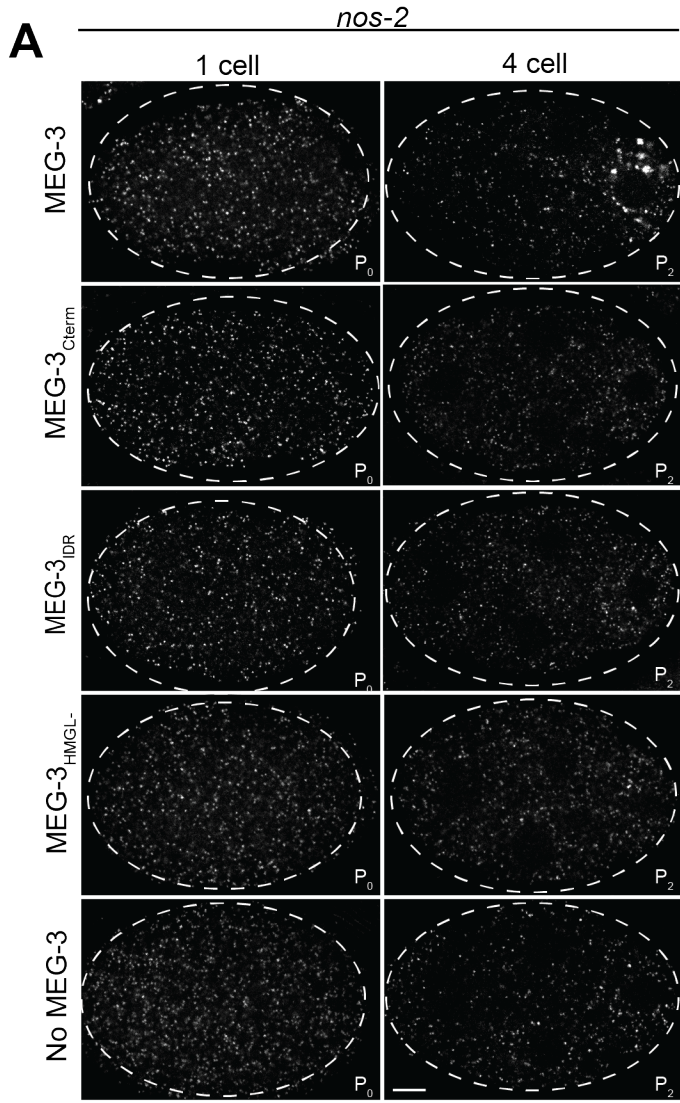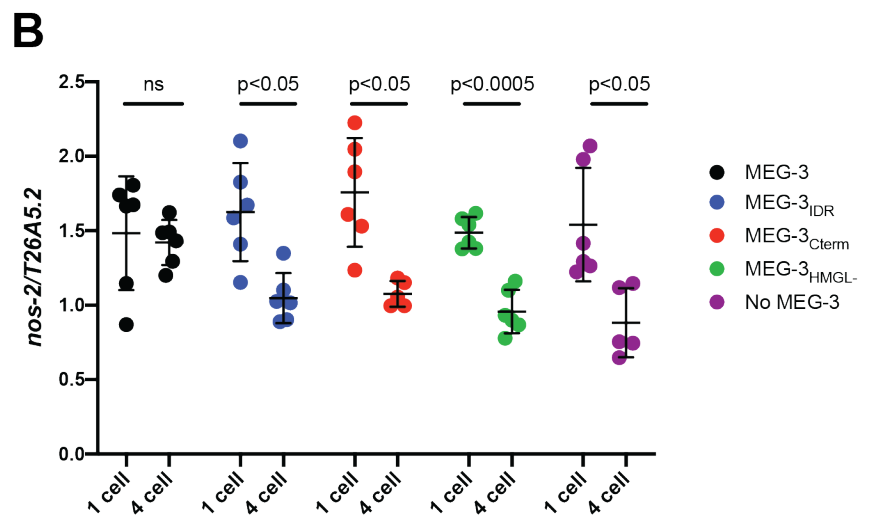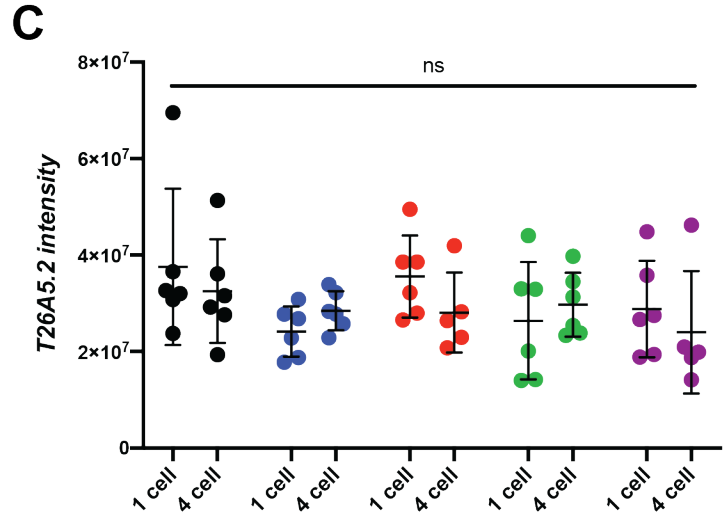

Supplement: supp [file elife-63698-supp-v1.zip]

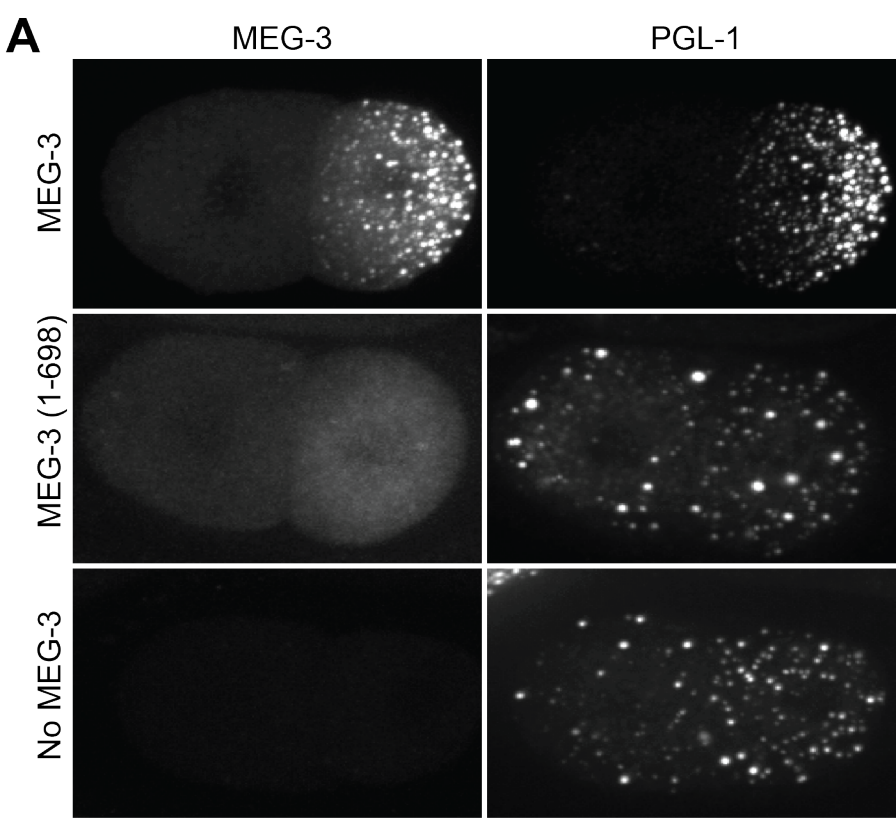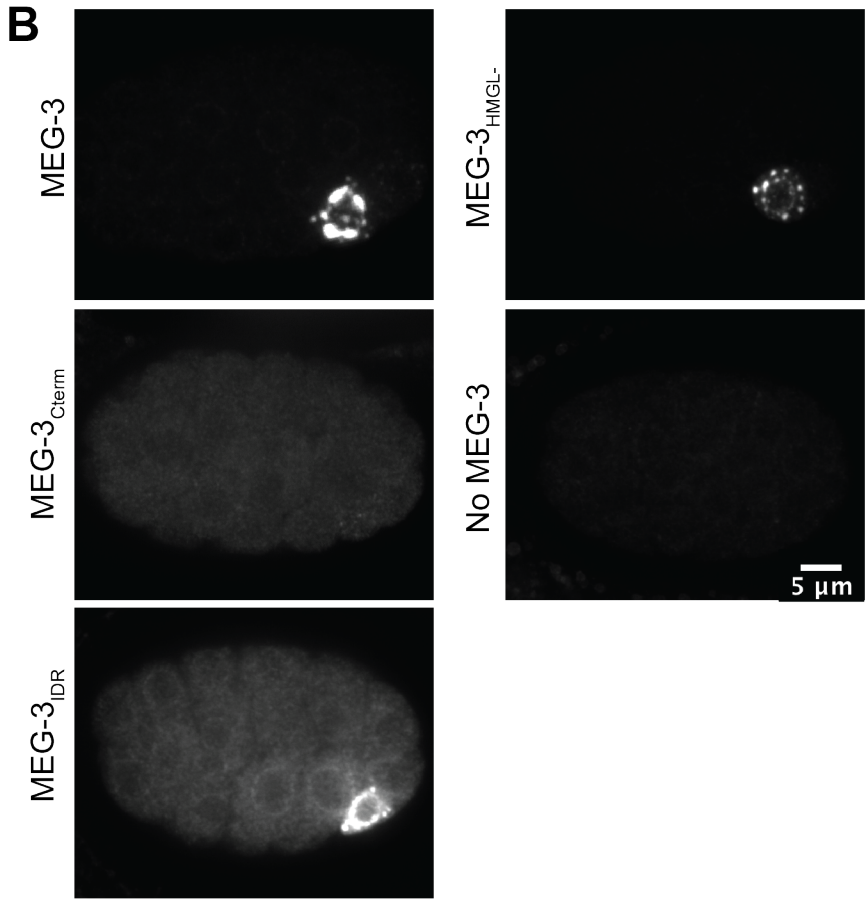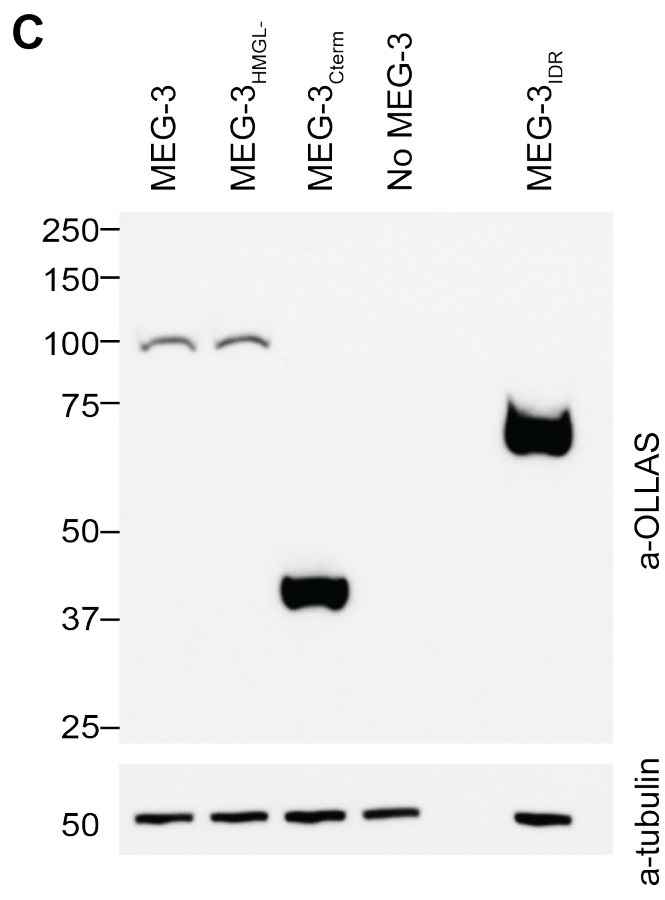

Supplement: supp [file elife-63698-supp-v1.zip]

**A**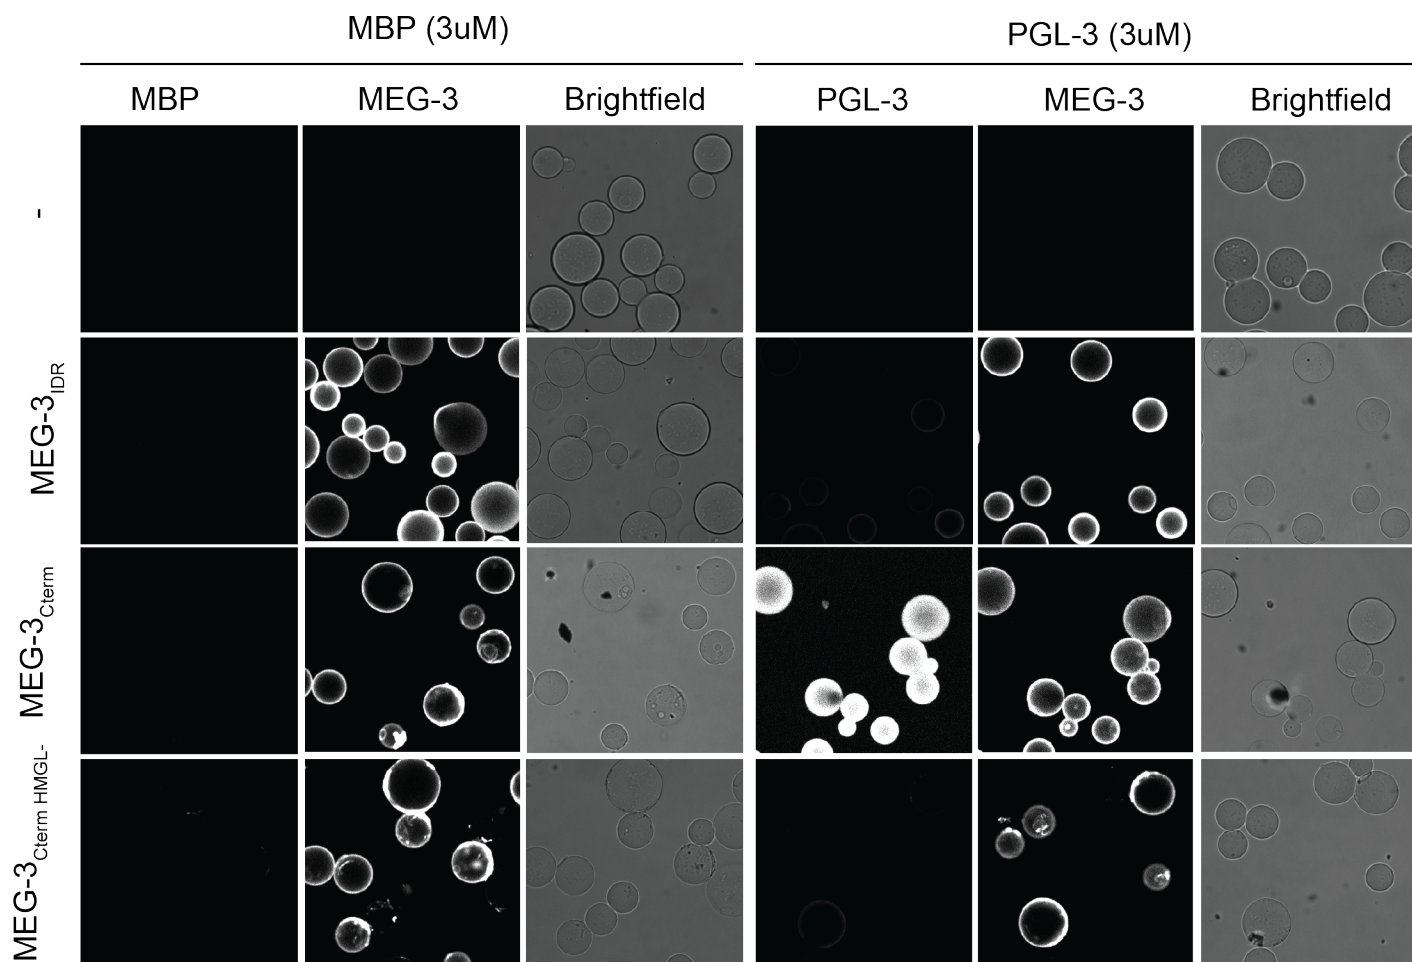**B**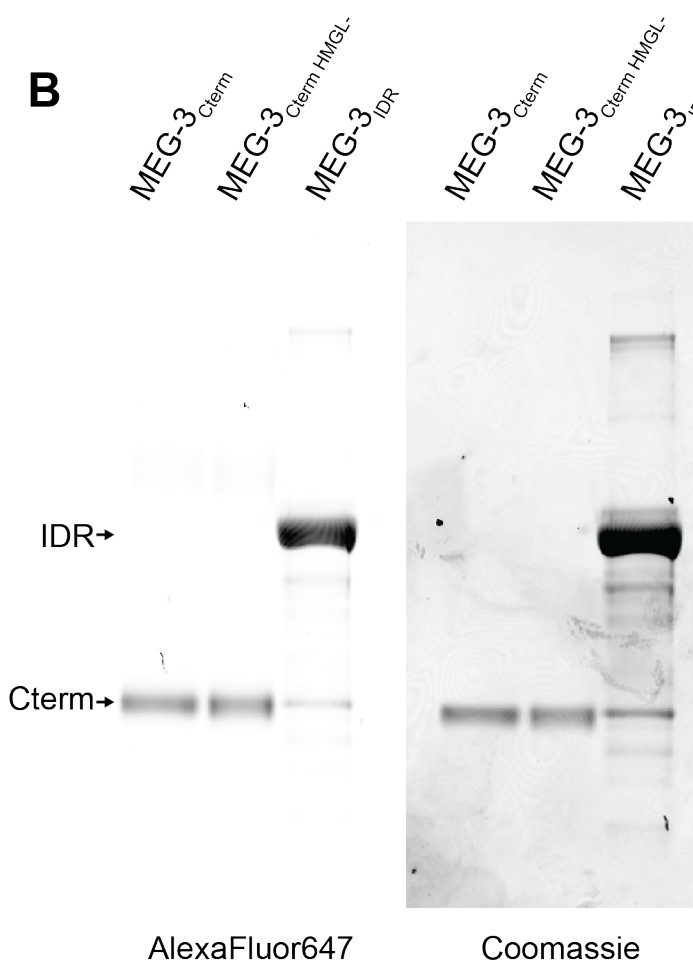**C**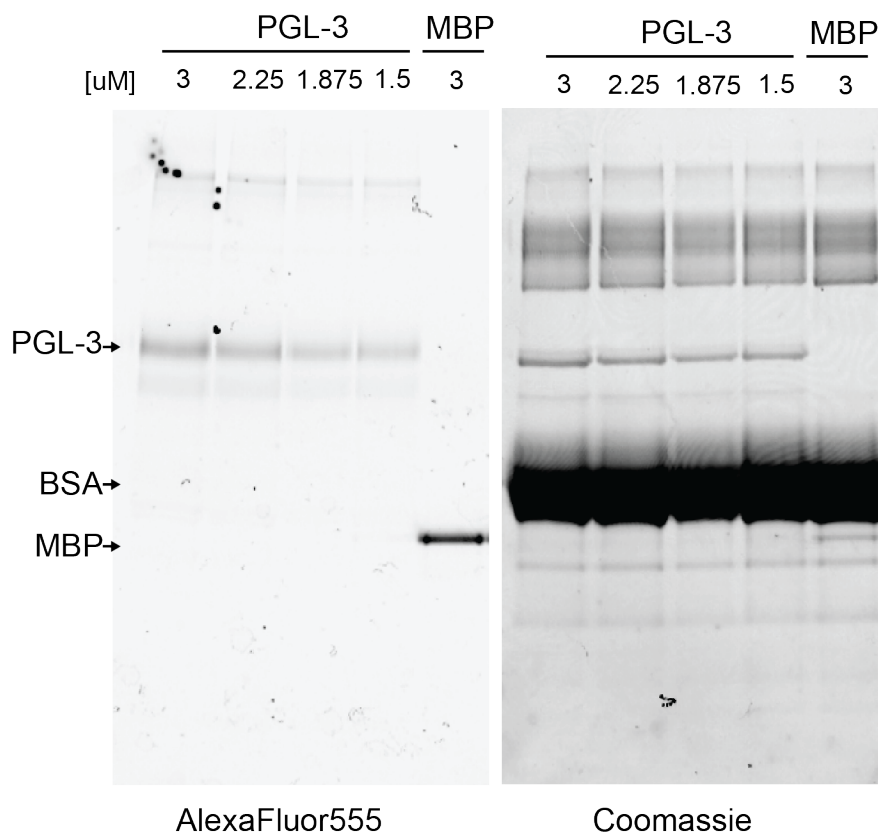

Supplement: supp [file elife-63698-supp-v1.zip]

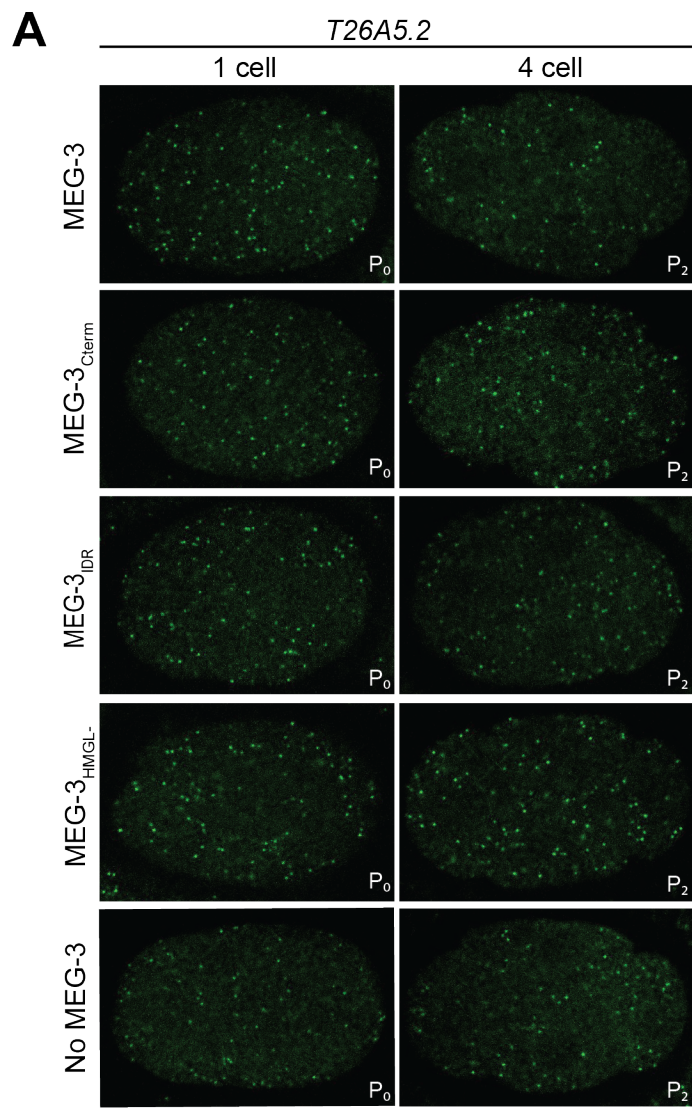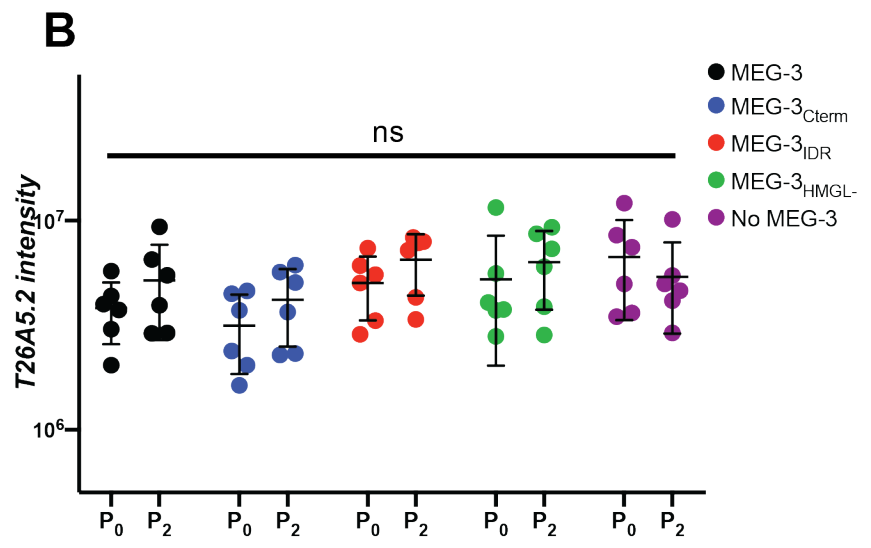

Supplement: supp [file elife-63698-supp-v1.zip]

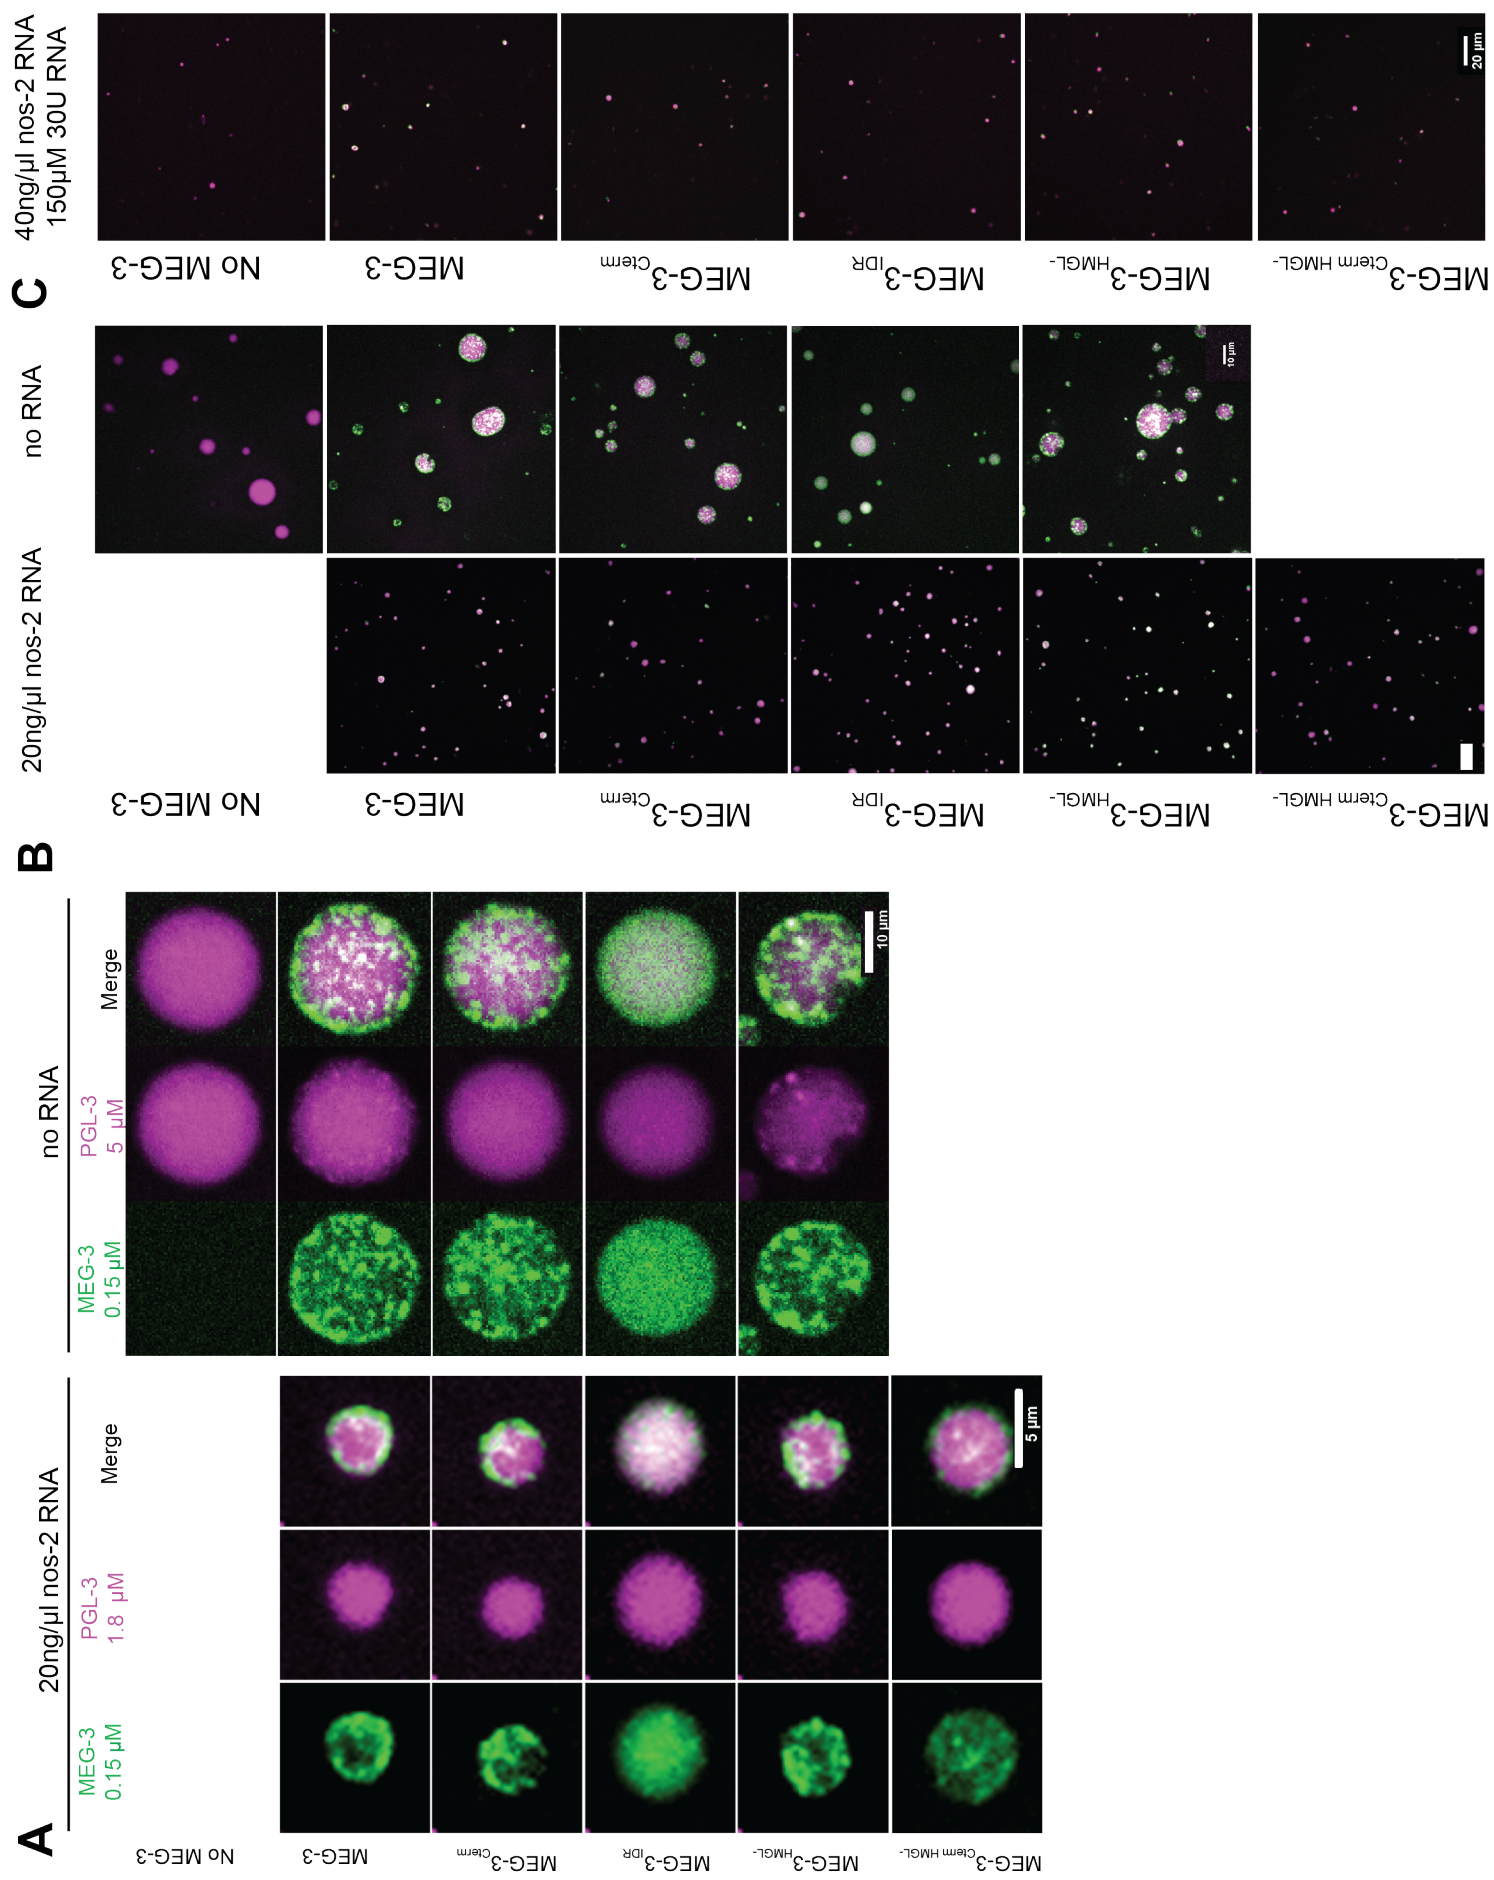

Supplement: supp [file elife-63698-supp-v1.zip]

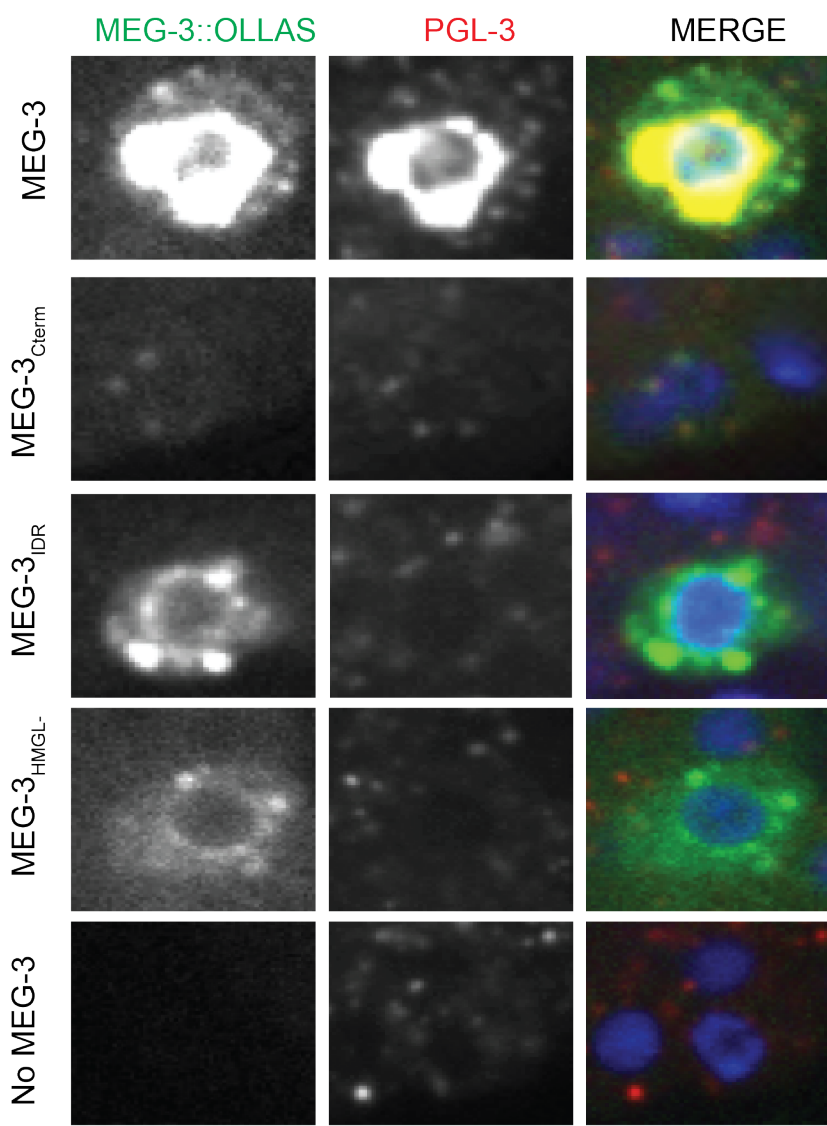

Supplement: supp [file elife-63698-supp-v1.zip]

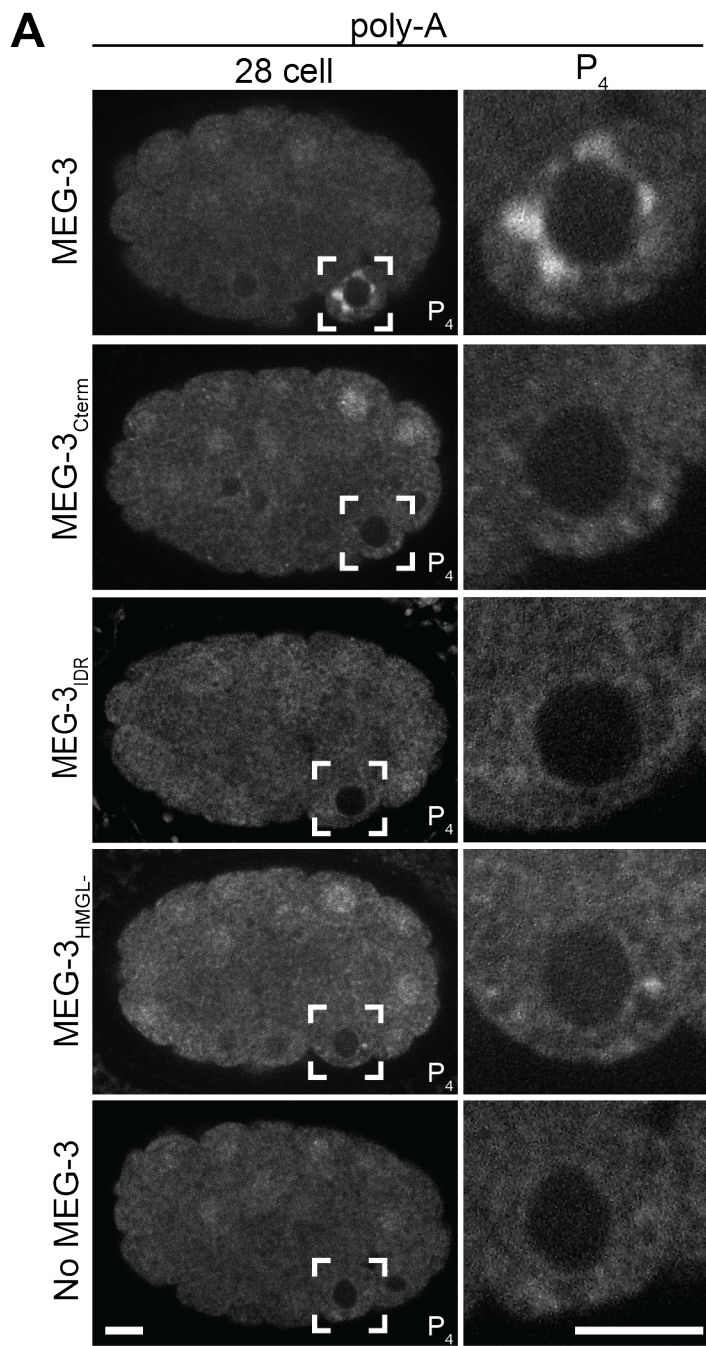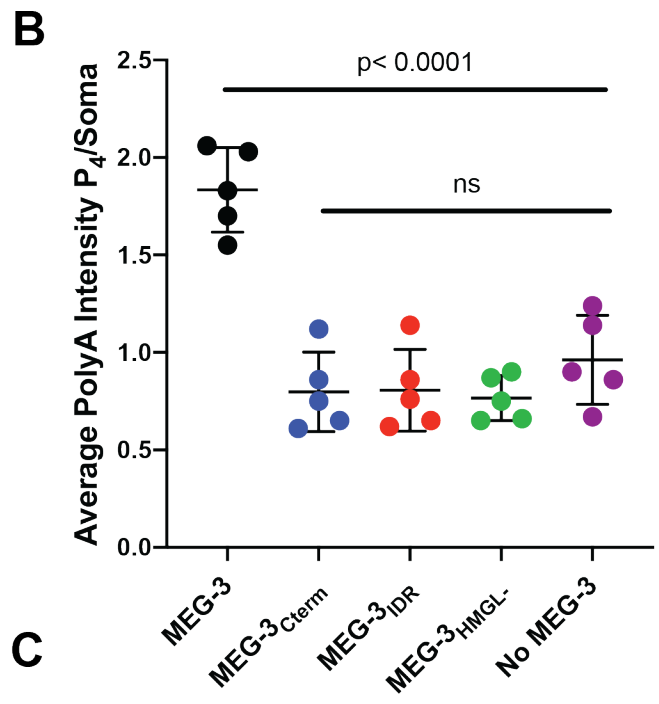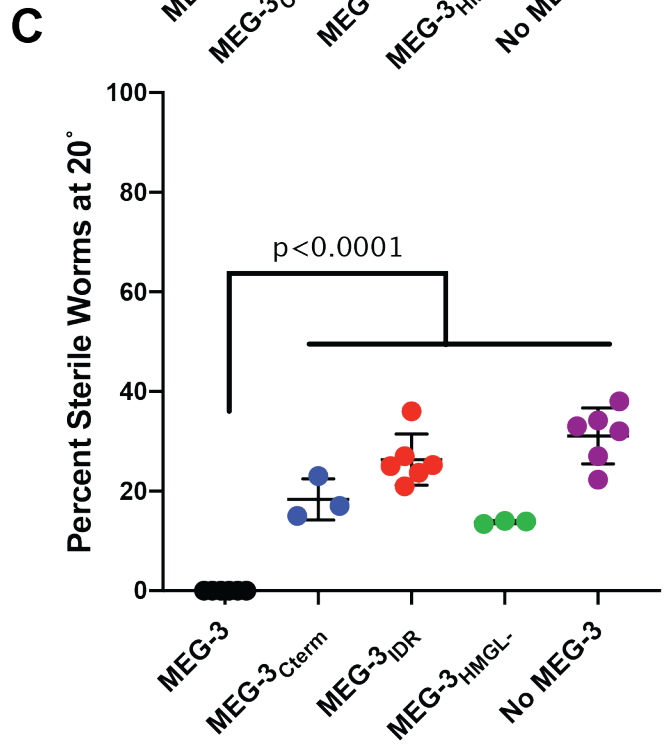

Supplement: supp [file elife-63698-supp-v1.zip]

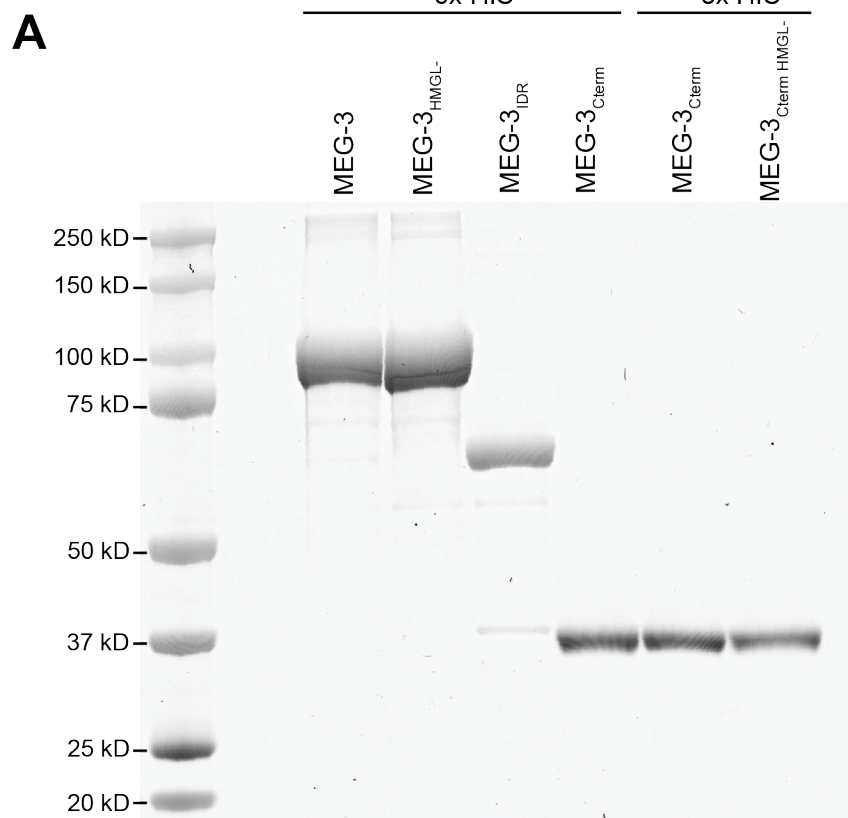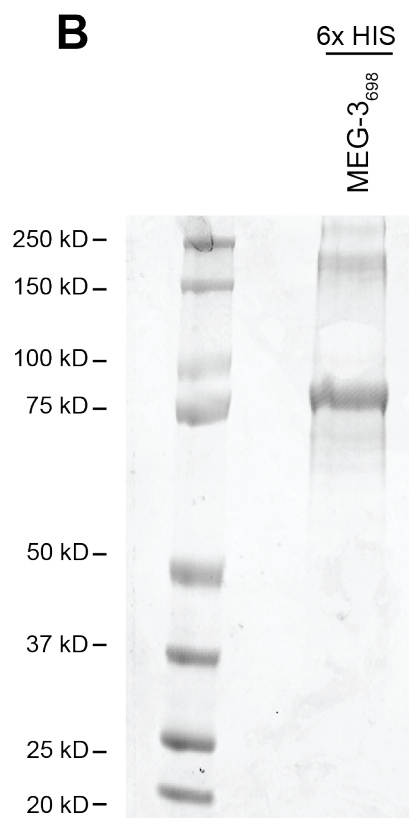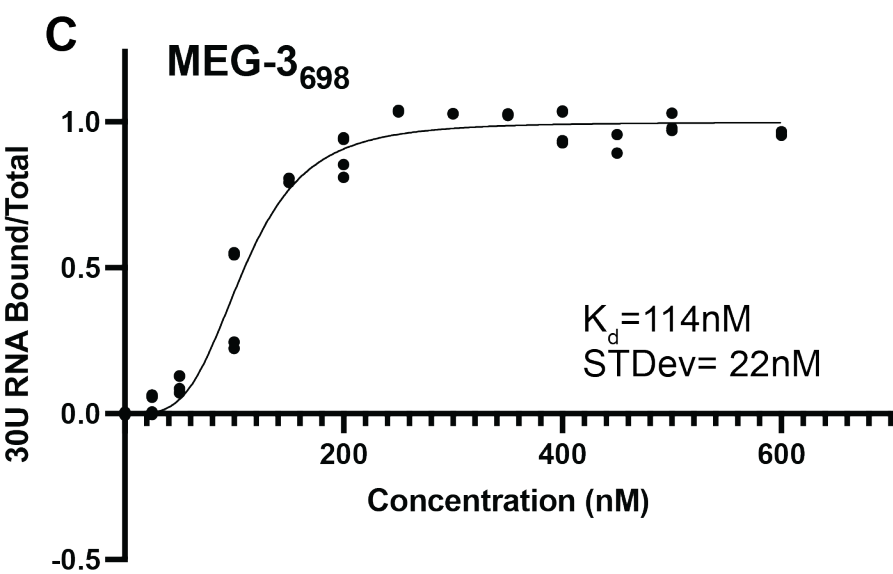

Supplement: supp [file elife-63698-supp-v1.zip]
